# Supplementary material for: Atoh1 is required for the formation of lateral line electroreceptors and hair cells, whereas FoxG1 represses an electrosensory fate
Source: eLife journal article supplement (doi:10.7554/elife.96285), 2025-06-25
Supplement: supp [file elife_poa_e96285_Supplementary_file_1.xlsx]

## Sheet: Suppl Table 1
Target gene	sgRNA mix	Number of independent batches	Batches analysed	Marker analysed	Number with phenotype				Number analysed	Percentage with phenotype				sgRNAs confirmed to disrupt target	Genotyping primer - forward	Genotyping primer - reverse
Tyr	1+2	5	6, 11, 14, 16, 18	melanin	41				63	0.650794				1, 2	GCGTCTCTCCAGTCCCAATA	AGAGAGAAGTGGCCCTTGGT
Tyr	1+2+3+4	1	1	melanin	4				15	0.266667				not genotyped
Tyr	5+6	2	6, 8	melanin	0				24	0				not genotyped
Tyr	7+8	3	15, 27, 31	melanin	18				33	0.545455				not genotyped
				Total	63				135	0.466667
								Excluding failed sgRNA mix 5+6:	111	0.567568
Tyr	1+2	3	14, 16, 18	Cacna1d	0				8	0				1, 2	GCGTCTCTCCAGTCCCAATA	AGAGAGAAGTGGCCCTTGGT
Tyr	1+2	2	16, 18	Kcnab3	0				8	0				1, 2	GCGTCTCTCCAGTCCCAATA	AGAGAGAAGTGGCCCTTGGT
Tyr	1+2	1	18	Gfi1	0				5	0				1, 2	GCGTCTCTCCAGTCCCAATA	AGAGAGAAGTGGCCCTTGGT
Tyr	1+2+3+4	1	1	Kcnab3	0				1	0				not genotyped
Tyr	1+2+3+4	1	1	Pou4f3	0				6	0				not genotyped
Tyr	1+2+3+4	1	1	Gfi1	0				3	0				not genotyped
Tyr	5+6	2	6, 8	Kcnab3	0				6	0				not genotyped
Tyr	5+6	2	6, 8	Gfi1	0				6	0				not genotyped
Tyr	7+8	2	27, 31	Cacna1d	0				16	0				not genotyped
Tyr	7+8	2	27, 31	Kcnab3	0				19	0				not genotyped
Tyr	7+8	2	27, 31	Pou4f3	0				3	0				not genotyped
Tyr	7+8	1	27	Gfi1	0				3	0				not genotyped
				Total	0				84	0
Atoh1	1+2	5	9, 15, 17, 23, 24	Cacna1d	13				22	0.590909				1, 2	GACACAGACAACAGCGAGGA	ACGGGAACTGCGTTGTATTC
Atoh1	1+2	2	19, 27	Kcnab3	8				13	0.615385				1, 2	GACACAGACAACAGCGAGGA	ACGGGAACTGCGTTGTATTC
Atoh1	1+2	3	17, 19, 27	Pou4f3	13				15	0.866667				1, 2	GACACAGACAACAGCGAGGA	ACGGGAACTGCGTTGTATTC
Atoh1	1+2	4	17, 19, 20, 27	Gfi1	9				14	0.642857				1, 2	GACACAGACAACAGCGAGGA	ACGGGAACTGCGTTGTATTC
				Total	43				64	0.671875
Neurod4	1	1	10	Kcnab3	0				3	0				1	ATGTACGAGGAGGAGGAAGAGGAAG	CTGCTTGAGCGAGAAGTTGACG
Neurod4	2	1	10	Kcnab3	0				11	0				2	ATGTACGAGGAGGAGGAAGAGGAAG	CTGCTTGAGCGAGAAGTTGACG
Neurod4	1+2+3+4	1	2	Cacna1d	0				2	0				not genotyped
Neurod4	5	1	10	Kcnab3	0				3	0				5	GAGAGAGCCCCAAAGAGACGAG	CTGCTTGAGCGAGAAGTTGACG
Neurod4	3+4+5+6	1	3	Kcnab3	0				3	0				4, 5	AAGACCCAGAAGCTGTCCAA	CTCCTGCTTGAGCGAGAAGT
Neurod4	1+6	2	25, 26	Kcnab3	0				9	0				not genotyped
Neurod4	7+9	1	29	Kcnab3	0				6	0				not genotyped
Neurod4	7+8+9	1	14	Cacna1d	0				2	0				7	GAGAGAGCCCCAAAGAGACGAG	CTGCTTGAGCGAGAAGTTGACG
Neurod4	7+8+9	2	14, 21	Kcnab3	0				9	0				7, 8, 9	GAGAGAGCCCCAAAGAGACGAG	CTGCTTGAGCGAGAAGTTGACG
				Total	0				48	0
					Any	Ectopic AOs	Electro- receptors inside NM	NM gaps		Any	Ectopic AOs	Electro- receptors inside NM	NM gaps
Foxg1	1+2	2	18, 20	Cacna1d	12	8	0	12	18	0.666667	0.444444	0	0.666667	1, 2	GATTGAGGTCCAACTGTGCTGC	GTCTGATGGAGTTTTGCCAGCC
Foxg1	1+2	2	18, 20	Kcnab3	16	15	3	14	24	0.666667	0.625	0.125	0.583333	1, 2	GATTGAGGTCCAACTGTGCTGC	GTCTGATGGAGTTTTGCCAGCC
Foxg1	1+2	2	18, 20	Mafa	15	9	1	13	18	0.833333	0.5	0.0555556	0.722222	1, 2	GATTGAGGTCCAACTGTGCTGC	GTCTGATGGAGTTTTGCCAGCC
Foxg1	1+2	1	18	Neurod4	4	3	0	3	6	0.666667	0.5	0	0.5	1, 2	GATTGAGGTCCAACTGTGCTGC	GTCTGATGGAGTTTTGCCAGCC
Foxg1	3+4	1	27	Cacna1d	1	0	0	1	6	0.166667	0	0	0.166667	3,4	GATTGAGGTCCAACTGTGCTGC	GTCTGATGGAGTTTTGCCAGCC
Foxg1	3+4	1	27	Kcnab3	8	7	3	5	15	0.533333	0.466667	0.2	0.333333	3,4	GATTGAGGTCCAACTGTGCTGC	GTCTGATGGAGTTTTGCCAGCC
				Total	56	42	7	48	87	0.643678	0.75	0.125	0.857143
siblings/half-siblings of Foxg1 crispants	N/A	1	20	Mafa	0				6	0				N/A
siblings/half-siblings of Foxg1 crispants	N/A	1	18	Neurod4	0				2	0				N/A
