# Supplementary material for: Atoh1 is required for the formation of lateral line electroreceptors and hair cells, whereas FoxG1 represses an electrosensory fate
Source: eLife. 2025 Jun 25;14:e96285. doi: 10.7554/eLife.96285 (PMC12456953; doi:10.7554/eLife.96285)
Supplement: Supplementary file 1. — For each sgRNA mix targeting tyrosinase, Atoh1, Neurod4, or Foxg1, the table shows the number of independent batches, markers used for analysis, percentage with phenotypes, and genotyping information including the genotyping primer sequences. The table also shows total numbers and percentage scores across each of the targeted genes. Most of the Tyr crispant data are shared between this study and Campbell et al., 2025. Tyr sgRNAs 7 and 8 were designed and published by Stundl et al., 2022 as their tyr sgRNA 3 and tyr sgRNA 4, respectively. [file elife-96285-supp1.xlsx]

## Sheet: Suppl File 1
Target gene	sgRNA mix	Number of independent batches	Batches analysed	Marker analysed	Number with phenotype				Number analysed	Percentage with phenotype				sgRNAs confirmed to disrupt target	Genotyping primer - forward	Genotyping primer - reverse
Tyr	1+2	5	6, 11, 14, 16, 18	melanin	41				63	0.650794				1, 2	GCGTCTCTCCAGTCCCAATA	AGAGAGAAGTGGCCCTTGGT
Tyr	1+2+3+4	1	1	melanin	4				15	0.266667				not genotyped
Tyr	5+6	2	6, 8	melanin	0				24	0				not genotyped
Tyr	7+8	3	15, 27, 31	melanin	18				33	0.545455				not genotyped
				Total	63				135	0.466667
								Excluding failed sgRNA mix 5+6:	111	0.567568
Tyr	1+2	3	14, 16, 18	Cacna1d	0				8	0				1, 2	GCGTCTCTCCAGTCCCAATA	AGAGAGAAGTGGCCCTTGGT
Tyr	1+2	2	16, 18	Kcnab3	0				8	0				1, 2	GCGTCTCTCCAGTCCCAATA	AGAGAGAAGTGGCCCTTGGT
Tyr	1+2	1	18	Gfi1	0				5	0				1, 2	GCGTCTCTCCAGTCCCAATA	AGAGAGAAGTGGCCCTTGGT
Tyr	1+2+3+4	1	1	Kcnab3	0				1	0				not genotyped
Tyr	1+2+3+4	1	1	Pou4f3	0				6	0				not genotyped
Tyr	1+2+3+4	1	1	Gfi1	0				3	0				not genotyped
Tyr	5+6	2	6, 8	Kcnab3	0				6	0				not genotyped
Tyr	5+6	2	6, 8	Gfi1	0				6	0				not genotyped
Tyr	7+8	2	27, 31	Cacna1d	0				16	0				not genotyped
Tyr	7+8	2	27, 31	Kcnab3	0				19	0				not genotyped
Tyr	7+8	2	27, 31	Pou4f3	0				3	0				not genotyped
Tyr	7+8	1	27	Gfi1	0				3	0				not genotyped
				Total	0				84	0
Atoh1	1+2	5	9, 15, 17, 23, 24	Cacna1d	13				22	0.590909				1, 2	GACACAGACAACAGCGAGGA	ACGGGAACTGCGTTGTATTC
Atoh1	1+2	2	19, 27	Kcnab3	8				13	0.615385				1, 2	GACACAGACAACAGCGAGGA	ACGGGAACTGCGTTGTATTC
Atoh1	1+2	3	17, 19, 27	Pou4f3	13				15	0.866667				1, 2	GACACAGACAACAGCGAGGA	ACGGGAACTGCGTTGTATTC
Atoh1	1+2	4	17, 19, 20, 27	Gfi1	9				14	0.642857				1, 2	GACACAGACAACAGCGAGGA	ACGGGAACTGCGTTGTATTC
				Total	43				64	0.671875
Neurod4	1	1	10	Kcnab3	0				3	0				1	ATGTACGAGGAGGAGGAAGAGGAAG	CTGCTTGAGCGAGAAGTTGACG
Neurod4	2	1	10	Kcnab3	0				11	0				2	ATGTACGAGGAGGAGGAAGAGGAAG	CTGCTTGAGCGAGAAGTTGACG
Neurod4	1+2+3+4	1	2	Cacna1d	0				2	0				not genotyped
Neurod4	5	1	10	Kcnab3	0				3	0				5	GAGAGAGCCCCAAAGAGACGAG	CTGCTTGAGCGAGAAGTTGACG
Neurod4	3+4+5+6	1	3	Kcnab3	0				3	0				4, 5	AAGACCCAGAAGCTGTCCAA	CTCCTGCTTGAGCGAGAAGT
Neurod4	1+6	2	25, 26	Kcnab3	0				9	0				not genotyped
Neurod4	7+9	1	29	Kcnab3	0				6	0				not genotyped
Neurod4	7+8+9	1	14	Cacna1d	0				2	0				7	GAGAGAGCCCCAAAGAGACGAG	CTGCTTGAGCGAGAAGTTGACG
Neurod4	7+8+9	2	14, 21	Kcnab3	0				9	0				7, 8, 9	GAGAGAGCCCCAAAGAGACGAG	CTGCTTGAGCGAGAAGTTGACG
				Total	0				48	0
					Any	Ectopic AOs	Electro- receptors inside NM	NM gaps		Any	Ectopic AOs	Electro- receptors inside NM	NM gaps
Foxg1	1+2	2	18, 20	Cacna1d	12	8	0	12	18	0.666667	0.444444	0	0.666667	1, 2	GATTGAGGTCCAACTGTGCTGC	GTCTGATGGAGTTTTGCCAGCC
Foxg1	1+2	2	18, 20	Kcnab3	16	15	3	14	24	0.666667	0.625	0.125	0.583333	1, 2	GATTGAGGTCCAACTGTGCTGC	GTCTGATGGAGTTTTGCCAGCC
Foxg1	1+2	2	18, 20	Mafa	15	9	1	13	18	0.833333	0.5	0.0555556	0.722222	1, 2	GATTGAGGTCCAACTGTGCTGC	GTCTGATGGAGTTTTGCCAGCC
Foxg1	1+2	1	18	Neurod4	4	3	0	3	6	0.666667	0.5	0	0.5	1, 2	GATTGAGGTCCAACTGTGCTGC	GTCTGATGGAGTTTTGCCAGCC
Foxg1	3+4	1	27	Cacna1d	1	0	0	1	6	0.166667	0	0	0.166667	3,4	GATTGAGGTCCAACTGTGCTGC	GTCTGATGGAGTTTTGCCAGCC
Foxg1	3+4	1	27	Kcnab3	8	7	3	5	15	0.533333	0.466667	0.2	0.333333	3,4	GATTGAGGTCCAACTGTGCTGC	GTCTGATGGAGTTTTGCCAGCC
				Total	56	42	7	48	87	0.643678	0.75	0.125	0.857143
siblings/half-siblings of Foxg1 crispants	N/A	1	20	Mafa	0				6	0				N/A
siblings/half-siblings of Foxg1 crispants	N/A	1	18	Neurod4	0				2	0				N/A
