# Supplementary material for: Atoh1 is required for the formation of lateral line electroreceptors and hair cells, whereas FoxG1 represses an electrosensory fate
Source: eLife. 2025 Jun 25;14:e96285. doi: 10.7554/eLife.96285 (PMC12456953; doi:10.7554/eLife.96285)
Supplement: Supplementary file 2. — For each of 64 Atoh1 crispants, the table shows the batch number, riboprobe used, and the laterality and severity of any phenotype as scored in lateral view on left and right sides independently, where ‘severe’ means more than two-thirds of cranial hair cells/electroreceptors were absent; ‘moderate’ means between one-third and two-thirds of cranial hair cells/electroreceptors were absent; ‘mild’ means less than one-third of cranial hair cells/electroreceptors were absent. The table also shows total numbers and percentage scores across all crispants. Crispants are ordered by riboprobe used, and within this by the presence or absence of a phenotype (with non-phenotypic crispants in blue font). [file elife-96285-supp2.xlsx]

## Sheet: Atoh1 crispants
Atoh1 Crispant	Batch	Riboprobe	Phenotype: 1=any; 0=none	Laterality of phenotype: 2=bilateral; 1=unilateral	Differential severity (L vs R): 1=different; 0=same	Highest degree of severity (either side): 3=severe; 2=moderate; 1=mild		Degree (L): 3=severe; 2=moderate; 1=mild	Degree (R): 3=severe; 2=moderate; 1=mild
50	9	Cacna1d	1	2	0	3		3	3
52	9	Cacna1d	1	1	1	1		1	0
53	9	Cacna1d	1	2	1	2		2	1
56	9	Cacna1d	1	2	1	3		3	2
57	9	Cacna1d	1	2	0	3		3	3
59	9	Cacna1d	1	2	0	3		3	3
104	17	Cacna1d	1	2	0	3		3	3
105	17	Cacna1d	1	2	0	3		3	3
106	17	Cacna1d	1	1	1	1		0	1
121	15	Cacna1d	1	1	1	1		1	0
124	15	Cacna1d	1	1	1	2		2	0
197	24	Cacna1d	1	2	0	3		3	3
199	23	Cacna1d	1	2	0	3		3	3
49	9	Cacna1d	0	0	0	0		0	0
51	9	Cacna1d	0	0	0	0		0	0
58	9	Cacna1d	0	0	0	0		0	0
103	17	Cacna1d	0	0	0	0		0	0
122	15	Cacna1d	0	0	0	0		0	0
123	15	Cacna1d	0	0	0	0		0	0
125	15	Cacna1d	0	0	0	0		0	0
126	15	Cacna1d	0	0	0	0		0	0
127	15	Cacna1d	0	0	0	0		0	0
109	17	Gfi1	1	2	0	1		1	1
110	17	Gfi1	1	1	1	2		0	2
111	17	Gfi1	1	2	1	3		3	2
112	17	Gfi1	1	2	1	3		3	2
113	17	Gfi1	1	2	0	3		3	3
114	17	Gfi1	1	2	0	3		3	3
128	20	Gfi1	1	1	1	3		3	0
200	27	Gfi1	1	1	1	1		1	0
202	27	Gfi1	1	2	0	3		3	3
107	17	Gfi1	0	0	0	0		0	0
108	17	Gfi1	0	0	0	0		0	0
132	20	Gfi1	0	0	0	0		0	0
152	19	Gfi1	0	0	0	0		0	0
201	27	Gfi1	0	0	0	0		0	0
133	19	Kcnab3	1	2	1	3		1	3
134	19	Kcnab3	1	2	0	3		3	3
135	19	Kcnab3	1	2	0	3		3	3
136	19	Kcnab3	1	2	0	3		3	3
138	19	Kcnab3	1	2	0	3		3	3
159	19	Kcnab3	1	1	1	1		1	0
214	27	Kcnab3	1	2	0	3		3	3
218	27	Kcnab3	1	2	1	3		2	3
137	19	Kcnab3	0	0	0	0		0	0
212	27	Kcnab3	0	0	0	0		0	0
213	27	Kcnab3	0	0	0	0		0	0
216	27	Kcnab3	0	0	0	0		0	0
217	27	Kcnab3	0	0	0	0		0	0
115	17	Pou4f3	1	2	0	3		3	3
117	17	Pou4f3	1	2	1	3		3	2
118	17	Pou4f3	1	2	0	3		3	3
119	17	Pou4f3	1	2	0	3		3	3
153	19	Pou4f3	1	2	0	3		3	3
154	19	Pou4f3	1	2	0	3		3	3
155	19	Pou4f3	1	2	0	3		3	3
156	19	Pou4f3	1	2	0	3		3	3
157	19	Pou4f3	1	2	0	3		3	3
158	19	Pou4f3	1	1	1	3		3	0
203	27	Pou4f3	1	2	0	3		3	3
204	27	Pou4f3	1	2	0	3		3	3
205	27	Pou4f3	1	1	1	3		3	0
116	17	Pou4f3	0	0	0	0		0	0
120	17	Pou4f3	0	0	0	0		0	0
64			43	Unilateral	17	Severe (3):	Total no. L+R sides	Severe (3) - L	Severe (3) - R	Total severe
crispants			with a phenotype	10	Differential severity	34	86	32	27	59
			0.671875	0.232558	(L vs R)	0.790698	= 2 x 43			0.776316
			of all crispants	of crispants	0.395349	of crispants	phenotypic crispants			of sides with a phenotype
				with a phenotype	of crispants	with a phenotype		Moderate (2) - L	Moderate (2) - R	Total moderate
				Bilateral:	with a phenotype	Moderate (2):	Total no. sides	3	5	8
				33		3	with a phenotype			0.105263
				0.767442		0.0697674	76			of sides with a phenotype
				of crispants		of crispants	0.883721	Mild (1) - L	Mild (1) - R	Total mild
				with a phenotype		with a phenotype		6	3	9
						Mild (1):				0.118421
						6				of sides with a phenotype
						0.139535
						of crispants
						with a phenotype
