# Supplementary material for: Atoh1 is required for the formation of lateral line electroreceptors and hair cells, whereas FoxG1 represses an electrosensory fate
Source: eLife. 2025 Jun 25;14:e96285. doi: 10.7554/eLife.96285 (PMC12456953; doi:10.7554/eLife.96285)
Supplement: Supplementary file 3. — For each of 87 Foxg1 crispants, the table shows the sgRNA mix used, batch number, riboprobe used, type of phenotype, if any (neuromast lines disrupted by ectopic ampullary organs, electroreceptors inside neuromasts, and/or neuromast gaps), and the laterality and severity of the phenotype as scored in lateral and ventral view for each of the pre-otic neuromast lines (supraorbital, infraorbital, otic and preopercular neuromast lines) on the left and right sides of the head. The phenotype was classed as ‘severe’ when more than two-thirds of the neuromast line was affected; ‘moderate’ when between one-third and two-thirds of the line was affected; and ‘mild’ when less than one-third of the line was affected. Crispants are ordered by sgRNA mix, then by riboprobe used, and within this by the presence or absence of a phenotype (with non-phenotypic crispants in blue font). The table also shows summary percentage data across crispants and individual neuromast lines. [file elife-96285-supp3.xlsx]

## Sheet: Foxg1 crispants
Foxg1 Crispant	sgRNA mix	Batch	RIboprobe	Phenotype: 1=any; 0=none	Ectopic AOs: 1=yes; 0=no	Electroreceptors inside NMs: 1=yes; 0=no	NM gaps: 1=yes; 0=no	Ectopic AOs & NM gaps: 1=yes; 0=no		Laterality of phenotype: 2=bilateral; 1=unilateral	Differential severity (L vs R): 0=no phenotype; 1=different lines affected; 2=same lines affected	Highest degree of severity (either side): 3=severe; 2=moderate; 1=mild		Degree (soL): 3=severe; 2=moderate; 1=mild	Phenotype (soL): AO=ectopic AO; ER=electro-receptors inside NM; G=NM gaps	Degree (ioL): 3=severe; 2=moderate; 1=mild	Phenotype (ioL): AO=ectopic AO; ER=electro-receptors inside NM; G=NM gaps	Degree (olL): 3=severe; 2=moderate; 1=mild	Phenotype (olL): AO=ectopic AO; ER=electroreceptors inside NM; G=NM gaps	Degree (popL): 3=severe; 2=moderate; 1=mild	Phenotype (popL): AO=ectopic AO; ER=electroreceptors inside NM; G=NM gaps	Highest degree of severity (L): 3=severe; 2=moderate; 1=mild		Degree (soR): 3=severe; 2=moderate; 1=mild	Phenotype (soR): AO=ectopic AO; ER=electro-receptors inside NM; G=NM gaps	Degree (ioR): 3=severe; 2=moderate; 1=mild	Phenotype (ioR): AO=ectopic AO; ER=electro-receptors inside NM; G=NM gaps	Degree (olR): 3=severe; 2=moderate; 1=mild	Phenotype (olR): AO=ectopic AO; ER=electro-receptors inside NM; G=NM gaps	Degree (popR): 3=severe; 2=moderate; 1=mild	Phenotype (popR): AO=ectopic AO; ER=electro-receptors inside NM; G=NM gaps	Highest degree of severity (R): 3=severe; 2=moderate; 1=mild
1	1+2	18	Cacna1d	1	1	0	1	1		2	1	3		2	AO, G	3	AO, G	3	G	1	AO, G	3		2	AO, G	3	AO, G	3	G	0		3
2	1+2	18	Cacna1d	1	0	0	1	0		1	1	1		0		0		1	G	0		1		0		0		0		0		0
3	1+2	18	Cacna1d	1	1	0	1	1		1	1	3		0		0		0		0		0		0		1	AO, G	3	G	0		3
5	1+2	18	Cacna1d	1	1	0	1	1		2	2	3		3	G	3	AO	3	G	0		3		2	AO, G	3	AO	3	AO, G	0		3
26	1+2	18	Cacna1d	1	0	0	1	0		1	1	2		0		0		0		0		0		0		0		2	G	0		2
27	1+2	18	Cacna1d	1	1	0	1	1		1	1	2		2	AO	1	AO, G	2	AO, G	0		2		0		0		0		0		0
28	1+2	18	Cacna1d	1	0	0	1	0		1	1	3		0		0		3	G	0		3		0		0		0		0		0
29	1+2	18	Cacna1d	1	0	0	1	0		1	1	2		0		0		0		0		0		0		0		2	G	0		2
30	1+2	18	Cacna1d	1	1	0	1	1		1	1	3		0		3	AO	1	G	0		3		0		0		0		0		0
31	1+2	18	Cacna1d	1	1	0	1	1		1	1	3		0		0		3	G	1	AO, G	3		0		0		0		0		0
63	1+2	20	Cacna1d	1	1	0	1	1		2	1	3		1	AO	3	AO	1	G	0		3		0		1	AO	0		0		1
65	1+2	20	Cacna1d	1	1	0	1	1		2	1	3		0		1	G	2	G	0		2		3	AO, G	3	AO, G	3	G	0		3
4	1+2	18	Cacna1d	0	0	0	0	0		0	0	0		0		0		0		0		0		0		0		0		0		0
6	1+2	18	Cacna1d	0	0	0	0	0		0	0	0		0		0		0		0		0		0		0		0		0		0
60	1+2	20	Cacna1d	0	0	0	0	0		0	0	0		0		0		0		0		0		0		0		0		0		0
61	1+2	20	Cacna1d	0	0	0	0	0		0	0	0		0		0		0		0		0		0		0		0		0		0
62	1+2	20	Cacna1d	0	0	0	0	0		0	0	0		0		0		0		0		0		0		0		0		0		0
64	1+2	20	Cacna1d	0	0	0	0	0		0	0	0		0		0		0		0		0		0		0		0		0		0
7	1+2	18	Kcnab3	1	0	0	1	0		1	1	1		0		0		0		0		0		0		0		1	G	0		1
8	1+2	18	Kcnab3	1	1	0	1	1		1	1	2		0		0		0		0		0		2	AO, G	0		2	G	0		2
9	1+2	18	Kcnab3	1	1	1	1	1		1	1	2		0		0		0		0		0		2	AO, G	1	ER	2	G	0		2
10	1+2	18	Kcnab3	1	1	0	0	0		1	1	1		1	AO	0		0		0		1		0		0		0		0		0
11	1+2	18	Kcnab3	1	1	0	1	1		1	1	1		1	AO	1	AO	1	G	1	G	1		0		0		0		0		0
13	1+2	18	Kcnab3	1	1	1	1	1		2	1	3		0		3	AO, G	2	G	1	AO	3		1	AO	1	AO, ER	2	G	0		2
14	1+2	18	Kcnab3	1	1	0	1	1		2	1	3		0		0		0		1	AO	1		0		0		3	G	0		3
15	1+2	18	Kcnab3	1	1	1	1	1		1	1	3		0		0		0		0		0		3	AO, G	2	AO, ER	2	ER	0		3
17	1+2	18	Kcnab3	1	1	0	1	1		2	2	3		1	AO, G	0		3	AO, G	0		3		1	G	0		1	G	0		1
18	1+2	18	Kcnab3	1	1	0	0	0		1	1	1		0		0		0		0		0		0		0		0		1	AO	1
40	1+2	18	Kcnab3	1	1	0	1	1		2	2	3		1	AO, G	1	G	2	G	0		2		3	AO, G	3	AO	3	G	0		3
66	1+2	20	Kcnab3	1	1	0	1	1		2	1	1		1	AO	1	G	1	G	0		1		0		0		1	G	0		1
67	1+2	20	Kcnab3	1	1	0	1	1		1	1	1		0		0		0		0		0		0		0		1	G	1	AO	1
69	1+2	20	Kcnab3	1	1	0	1	1		1	1	2		0		0		0		0		0		0		0		2	G	1	AO	2
70	1+2	20	Kcnab3	1	1	0	1	1		1	1	2		0		1	AO, G	2	AO, G	0		2		0		0		0		0		0
71	1+2	20	Kcnab3	1	1	0	1	1		2	2	1		0		0		1	G	1	AO	1		0		0		1	AO, G	1	AO	1
12	1+2	18	Kcnab3	0	0	0	0	0		0	0	0		0		0		0		0		0		0		0		0		0		0
16	1+2	18	Kcnab3	0	0	0	0	0		0	0	0		0		0		0		0		0		0		0		0		0		0
35	1+2	18	Kcnab3	0	0	0	0	0		0	0	0		0		0		0		0		0		0		0		0		0		0
36	1+2	18	Kcnab3	0	0	0	0	0		0	0	0		0		0		0		0		0		0		0		0		0		0
37	1+2	18	Kcnab3	0	0	0	0	0		0	0	0		0		0		0		0		0		0		0		0		0		0
38	1+2	18	Kcnab3	0	0	0	0	0		0	0	0		0		0		0		0		0		0		0		0		0		0
39	1+2	18	Kcnab3	0	0	0	0	0		0	0	0		0		0		0		0		0		0		0		0		0		0
68	1+2	20	Kcnab3	0	0	0	0	0		0	0	0		0		0		0		0		0		0		0		0		0		0
22	1+2	18	Mafa	1	0	0	1	0		1	1	2		0		0		2	G	0		2		0		0		0		0		0
23	1+2	18	Mafa	1	1	0	1	1		2	1	1		0		0		0		1	AO	1		0		0		1	G	0		1
24	1+2	18	Mafa	1	1	0	1	1		1	1	1		1	G	0		0		1	AO	1		0		0		0		0		0
53	1+2	18	Mafa	1	0	0	1	0		1	1	3		0		0		0		0		0		0		0		3	G	0		3
54	1+2	18	Mafa	1	1	1	1	1		2	1	3		0		3	AO, ER	2	G	1	AO, G	3		2	AO, G	3	AO, G	0		0		3
55	1+2	18	Mafa	1	0	0	1	0		2	2	2		0		0		1	G	0		1		0		0		2	G	0		2
56	1+2	18	Mafa	1	1	0	0	0		1	1	1		0		1	AO	0		0		1		0		0		0		0		0
57	1+2	18	Mafa	1	1	0	1	1		1	1	2		1	AO	1	G	2	G	0		2		0		0		0		0		0
58	1+2	18	Mafa	1	0	0	1	0		1	1	2		0		0		2	G	0		2		0		0		0		0		0
59	1+2	18	Mafa	1	1	0	1	1		2	1	2		0		0		0		1	AO	1		0		0		2	G	0		2
75	1+2	20	Mafa	1	1	0	1	1		1	1	2		2	AO	1	G	1	G	0		2		0		0		0		0		0
76	1+2	20	Mafa	1	0	0	1	0		1	1	3		0		0		3	G	0		3		0		0		0		0		0
79	1+2	20	Mafa	1	1	0	1	1		1	1	1		0		0		0		0		0		1	AO	1	G	0		0		1
80	1+2	20	Mafa	1	0	0	1	0		1	1	1		0		0		1	G	0		1		0		0		0		0		0
926	1+2	18	Mafa	1	1	0	0	0		1	1	1		0		0		0		1	AO	1		0		0		0		0		0
25	1+2	18	Mafa	0	0	0	0	0		0	0	0		0		0		0		0		0		0		0		0		0		0
77	1+2	20	Mafa	0	0	0	0	0		0	0	0		0		0		0		0		0		0		0		0		0		0
78	1+2	20	Mafa	0	0	0	0	0		0	0	0		0		0		0		0		0		0		0		0		0		0
20	1+2	18	Neurod4	1	1	0	1	1		2	1	3		0		0		1	G	0		1		0		3	AO, G	1	G	0		3
21	1+2	18	Neurod4	1	1	0	1	1		1	1	3		0		0		0		0		0		3	AO	1	AO	1	G	0		3
33	1+2	18	Neurod4	1	1	0	0	0		1	1	2		0		0		0		0		0		0		2	AO	0		0		2
34	1+2	18	Neurod4	1	0	0	1	0		2	2	3		0		0		1	G	0		1		0		0		3	G	0		3
19	1+2	18	Neurod4	0	0	0	0	0		0	0	0		0		0		0		0		0		0		0		0		0		0
32	1+2	18	Neurod4	0	0	0	0	0		0	0	0		0		0		0		0		0		0		0		0		0		0
93	3+4	27	Cacna1d	1	0	0	1	0		1	1	2		2	G	0		0		0		2		0		0		0		0		0
92	3+4	27	Cacna1d	0	0	0	0	0		0	0	0		0		0		0		0		0		0		0		0		0		0
94	3+4	27	Cacna1d	0	0	0	0	0		0	0	0		0		0		0		0		0		0		0		0		0		0
95	3+4	27	Cacna1d	0	0	0	0	0		0	0	0		0		0		0		0		0		0		0		0		0		0
96	3+4	27	Cacna1d	0	0	0	0	0		0	0	0		0		0		0		0		0		0		0		0		0		0
97	3+4	27	Cacna1d	0	0	0	0	0		0	0	0		0		0		0		0		0		0		0		0		0		0
98	3+4	27	Kcnab3	1	1	0	0	0		1	1	1		0		0		0		0		0		0		0		0		1	AO	1
99	3+4	27	Kcnab3	1	1	0	1	1		1	1	2		0		0		0		0		0		2	AO, G	1	AO, G	1	AO, G	0		2
101	3+4	27	Kcnab3	1	1	0	0	0		1	1	1		0		0		0		1	AO	1		0		0		0		0		0
103	3+4	27	Kcnab3	1	1	1	1	1		1	1	3		0		0		0		0		0		0		2	AO, ER	3	G	0		3
106	3+4	27	Kcnab3	1	1	1	0	0		2	1	1		0		0		0		1	AO	1		0		1	ER	0		1	AO	1
108	3+4	27	Kcnab3	1	1	0	1	1		1	1	2		0		1	AO	2	G	0		2		0		0		0		0		0
110	3+4	27	Kcnab3	1	0	1	1	0		2	1	2		0		1	ER	0		0		1		0		0		2	G	0		2
112	3+4	27	Kcnab3	1	1	0	1	1		1	1	3		1	AO, G	3	AO, G	3	G	0		3		0		0		0		0		0
100	3+4	27	Kcnab3	0	0	0	0	0		0	0	0		0		0		0		0		0		0		0		0		0		0
102	3+4	27	Kcnab3	0	0	0	0	0		0	0	0		0		0		0		0		0		0		0		0		0		0
104	3+4	27	Kcnab3	0	0	0	0	0		0	0	0		0		0		0		0		0		0		0		0		0		0
105	3+4	27	Kcnab3	0	0	0	0	0		0	0	0		0		0		0		0		0		0		0		0		0		0
107	3+4	27	Kcnab3	0	0	0	0	0		0	0	0		0		0		0		0		0		0		0		0		0		0
109	3+4	27	Kcnab3	0	0	0	0	0		0	0	0		0		0		0		0		0		0		0		0		0		0
111	3+4	27	Kcnab3	0	0	0	0	0		0	0	0		0		0		0		0		0		0		0		0		0		0
87				56	42	7	48	34		Unilateral	Differential severity	Highest degree of	Total no. sides (L+R)	Severe (3) - soL	AO only - soL	Severe (3) - ioL	AO only - ioL	Severe (3) - olL	AO only - olL	Severe (3) - popL	AO only - popL	Severe (3) - L:		Severe (3) - soR	AO only - soR	Severe (3) - ioR	AO only - ioR	Severe (3) - olR	AO only - olR	Severe (3) - popR	AO only - popR	Severe (3) - R:
crispants				with any phenotype	with ectopic AOs	with ERs inside NMs	with NM gaps	with ectopic AOs		38	(L vs R)	severity (either side)	112	1	7	7	6	7	0	0	9	11		4	3	6	5	9	0	0	6	13
				0.643678	0.482759	0.0804598	0.551724	and NM gaps		0.678571	Different lines affected (1):	Severe (3):	[= 2 x 56
				of all crispants	of all crispants	of all crispants	of all crispants	0.390805		of crispants	50	21	phenotypic crispants]	Moderate (2) - soL	ER only - soL	Moderate (2) - ioL	ER only - ioL	Moderate (2) - olL	ER only - olL	Moderate (2) - popL	ER only - popL	Moderate (2) - L:		Moderate (2) - soR	ER only - soR	Moderate (2) - ioR	ER only - ioR	Moderate (2) - olR	ER only - olR	Moderate (2) - popR	ER only - popR	Moderate (2) - R:
					0.75	0.125	0.857143	of all crispants		with a phenotype	0.892857	0.375		4	0	0	1	10	0	0	0	10		6	0	3	2	10	1	0	0	11
					of crispants	of crispants	of crispants	0.607143		Bilateral:	of crispants	of crispants	Total no. sides
					with a phenotype	with a phenotype	with a phenotype	of crispants		18	with a phenotype	with a phenotype	with a phenotype	Mild (1) - soL	G only - soL	Mild (1) - ioL	G only - ioL	Mild (1) - olL	G only - olL	Mild (1) - popL	G only - popL	Mild (1) - L:		Mild (1) - soR	G only - soR	Mild (1) - ioR	G only - ioR	Mild (1) - olR	G only - olR	Mild (1) - popR	G only - popR	Mild (1) - R:
								with a phenotype		0.321429	Same lines affected (2):	Moderate (2):	74	9	3	11	5	11	25	13	1	18		3	1	8	1	9	24	6	0	11
										of crispants	6	18	0.660714
										with a phenotype	0.107143	0.321429		Total soL	AO+G - soL	Total ioL	AO+G - ioL	Total olL	AO+G - olL	Total popL	AO+G - popL	Total L sides		Total soR	AO+G - soR	Total ioR	AO+G - ioR	Total olR	AO+G - olR	Total popR	AO+G - popR	Total R sides
											of crispants	of crispants		with a phenotype	4	with a phenotype	5	with a phenotype	3	with a phenotype	3	with a phenotype		with a phenotype	9	with a phenotype	6	with a phenotype	3	with a phenotype	0	with a phenotype
											with a phenotype	with a phenotype		14		18		28		13		39		13		17		28		6		35
												Mild (1):			AO (all) - soL		AO+ER - ioL		AO (all) - olL		AO (all) - popL				AO (all) - soR		AO+ER - ioR		AO (all) - olR		AO (all) - popR
												17			11		1		3		12				12		3		3		6
												0.303571
												of crispants			ER (all) - soL		AO (all) - ioL		ER (all) - olL		ER (all) - popL				ER (all) - soR		AO (all) - ioR		ER (all) - olR		ER (all) - popR
												with a phenotype			0		12		0		0				0		14		1		0
															G (all) - soL		ER (all) - ioL		G (all) - olL		G (all) - popL				G (all) - soR		ER (all) - ioR		G (all) - olR		G (all) - popR
															7		2		28		4				10		5		27		0
																	G (all) - ioL										G (all) - ioR
																	10										7
										Neuromast line	Any phenotype	3 - severe	2 - moderate	1 - mild	Ectopic AOs (all)	ERs inside NM (all)	NM gaps (all)	Ectopic AOs + ERs inside NM	Ectopic AOs + NM gaps	Ectopic AOs only	ERs inside NM only	NM gaps only	Neuromast line
											n	n	n	n	n	n	n	n	n	n	n	n
											% of phenotypic sides	% for that line	% for that line	% for that line	% for that line	% for that line	% for that line	% for that line	% for that line	% for that line	% for that line	% for that line
										supraorbital (so)	27	5	10	12	23	0	17	0	13	10	0	4	supraorbital (so)
											0.364865	0.185185	0.37037	0.444444	0.851852	0	0.62963	0	0.481481	0.37037	0	0.148148
										infraorbital (io)	35	13	3	19	26	7	17	4	11	11	3	6	infraorbital (io)
											0.472973	0.371429	0.0857143	0.542857	0.742857	0.2	0.485714	0.114286	0.314286	0.314286	0.0857143	0.171429
										otic line (ol)	56	16	20	20	6	1	55	0	6	0	1	49	otic line (ol)
											0.756757	0.285714	0.357143	0.357143	0.107143	0.0178571	0.982143	0	0.107143	0	0.0178571	0.875
										preopercular (pop)	19	0	0	19	18	0	4	0	3	15	0	1	preopercular (pop)
											0.256757	0	0	1	0.947368	0	0.210526	0	0.157895	0.789474	0	0.0526316
