# Supplementary material for: Atoh1 is required for the formation of lateral line electroreceptors and hair cells, whereas FoxG1 represses an electrosensory fate
Source: eLife. 2025 Jun 25;14:e96285. doi: 10.7554/eLife.96285 (PMC12456953; doi:10.7554/eLife.96285)
Supplement: Supplementary file 4. — For each riboprobe used for in situ hybridisation for Neurod family genes, the table shows the primer sequences used for cloning the cDNA template, the GenBank accession number of the top-matched ohnolog and the nucleotide range targeted by the riboprobe. The table also shows the chromosomal location, riboprobe percentage identity and genome annotation of both the top-matched ohnolog and the second ohnolog. Equivalent information is given for a previously published paddlefish (Polyodon spathula) Cacna1d riboprobe (Modrell et al., 2017a) used to analyse two Atoh1 sterlet crispants. [file elife-96285-supp4.xlsx]

## Sheet: Suppl File 4
Species	Gene	Type	Forward primer	Reverse primer	GenBank accession of top match	Nucleotide range targeted by riboprobe	Chromosomal location of targeted ohnolog	Riboprobe % identity with targeted ohnolog	Annotation of the targeted ohnolog	Chromosomal location of second ohnolog	Riboprobe % identity with second ohnolog	Annotation of the second ohnolog	Comments
Acipenser ruthenus	Neurod1	synthetic gene fragment	n/a	n/a	XM_034043796.3	1-576	Chr 11	100	neurogenic differentiation factor 1-like	Chr 10	98.61	neurogenic differentiation factor 1-like	GenBank accession of the synthetic gene fragment used for riboprobe synthesis is OQ808944.
Acipenser ruthenus	Neurod2	synthetic gene fragment	n/a	n/a	XM_034055401.3	1-576	Chr 33	99.83	neurogenic differentiation factor 2-like	Chr 28	96.18	neurogenic differentiation factor 2	GenBank accession of the synthetic gene fragment used for riboprobe synthesis is OQ808945.
Acipenser ruthenus	Neurod4	cloned	GAGAGAGCCCCAAAGAGACGAG	CTGCTTGAGCGAGAAGTTGACG	XM_059013136.1	662-1291	Chr 45	98.93	neurogenic differentiation factor 4-like	unknown	98.93	neurogenic differentiation factor 4-like	Both ohnologs are equally targeted.
Acipenser ruthenus	Neurod4	synthetic gene fragment	n/a	n/a	XM_059013136.1	1-630	Chr 45	100	neurogenic differentiation factor 4-like	unknown	100	neurogenic differentiation factor 4-like	Both ohnologs are equally targeted. GenBank accession of the synthetic gene fragment used for riboprobe synthesis is OQ808946.
Acipenser ruthenus	Neurod6	synthetic gene fragment	n/a	n/a	XM_059018747.1	1-558	Chr 3	99.28	neurogenic differentiation factor 6-a-like	Chr 4	97.67	neurogenic differentiation factor 6-a-like	GenBank accession of the synthetic gene fragment used for riboprobe synthesis is OQ808947.
Polyodon spathula riboprobe used in A. ruthenus	Cacna1d	cloned (Modrell et al., 2017a)			XM_058988402.1	5915-7146	Chr 16	95.4	voltage-dependent L-type calcium channel subunit alpha-1D-like	Chr 25	95.4	voltage-dependent L-type calcium channel subunit alpha-1D-like	Both ohnologs are equally targeted. Used to analyse two sterlet Atoh1 crispants. Previously published by Modrell et al. (2017a). GenBank accession of the cloned fragment used for riboprobe synthesis is KY781950.1.
